# Supplementary material
Source: PubMed Central journal article supplement (PMC8809483)

**Fig. 7a****Fig. 7b**pSTAT3  
(Y705)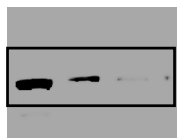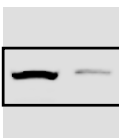- 95  
- 72

STAT3

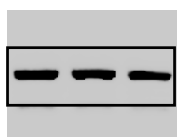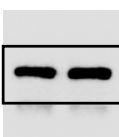- 95  
- 72pSTAT6  
(Y641)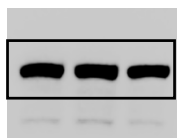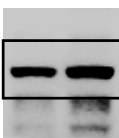- 130  
- 95

STAT6

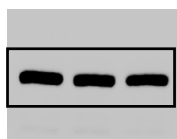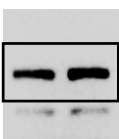- 130  
- 95

iNOS

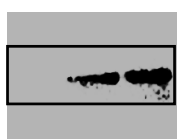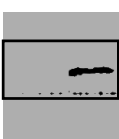

- 130

ARG1

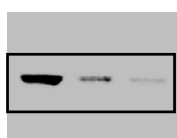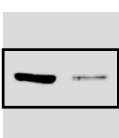- 55  
- 43

IBA1

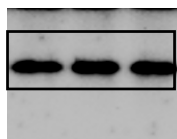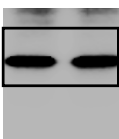- 26  
- 17

BACE1

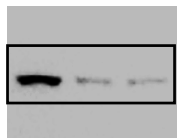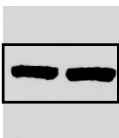- 72  
- 55

GAPDH

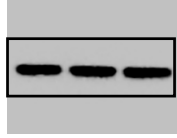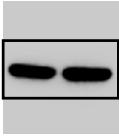

- 34

**Fig. 7f****Fig. 7g**

CD163

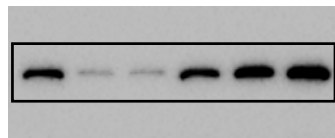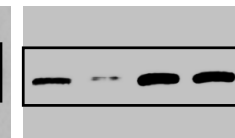

- 130

ARG1

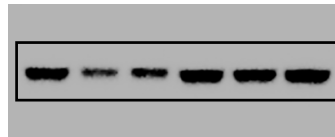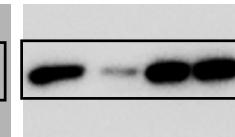- 55  
- 43

iNOS

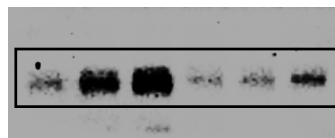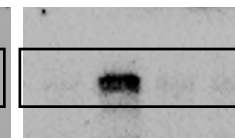

- 130

HLA-DR

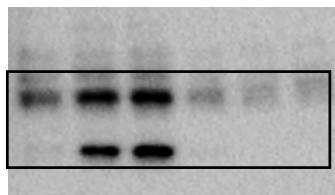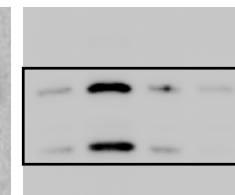- 34  
- 26

BACE1

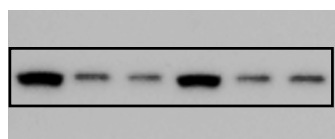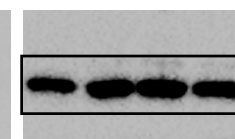- 72  
- 55

IBA1

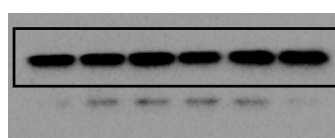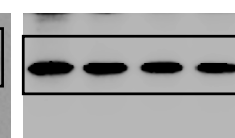- 26  
- 17

STAT3

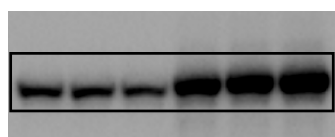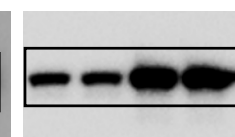- 95  
- 72STAT3-C  
-Flag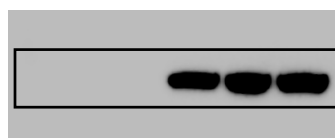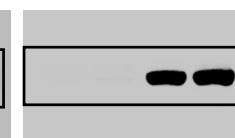- 95  
- 72

GAPDH

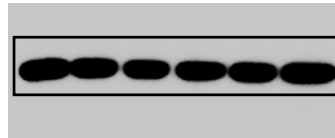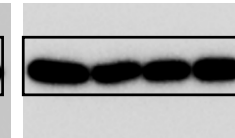

- 34

**Fig. 7h**

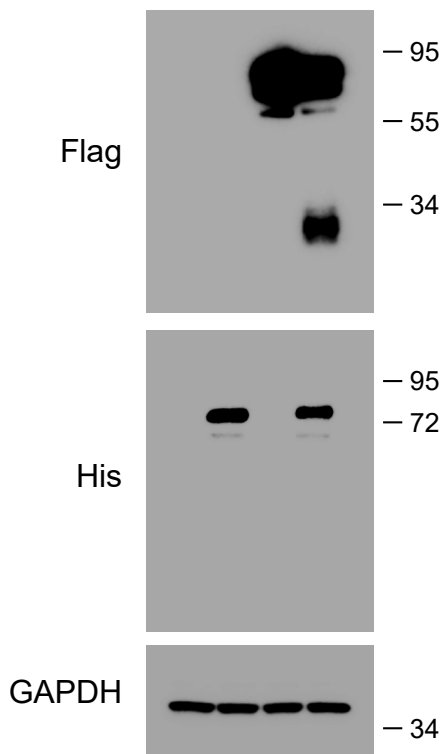

**Fig. 7i**

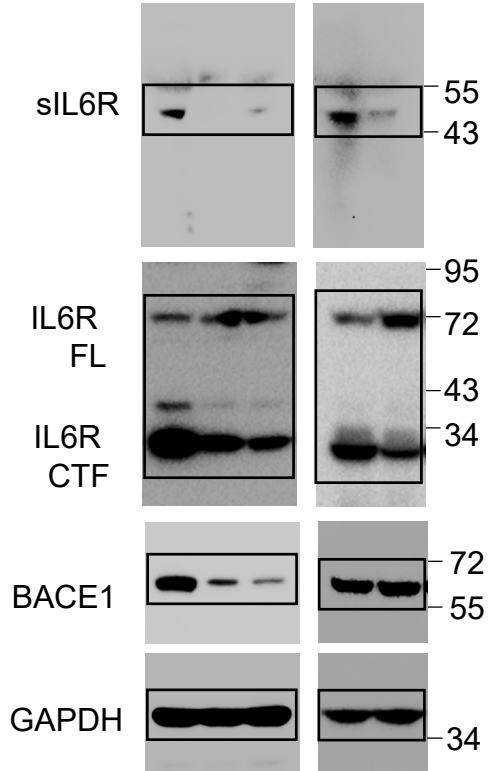

**Fig. 7j**

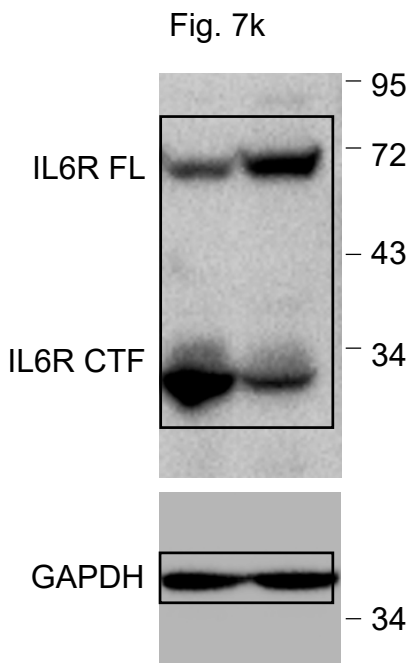

**Fig. 7l**

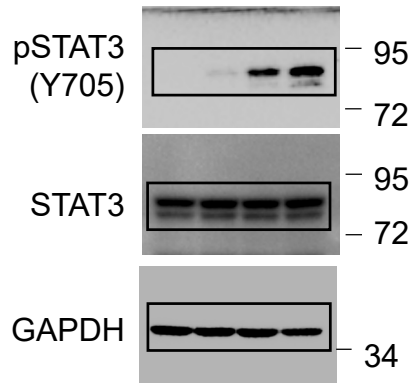

Supplement: NIHMS1740592-supplement-Blots_Source_Data_of_Fig__7.pdf [file NIHMS1740592-supplement-Blots_Source_Data_of_Fig__7.pdf]
