# Supplementary material
Source: PubMed Central journal article supplement (PMC8809483)

# Gating Strategy for Extended Data Fig. 1d

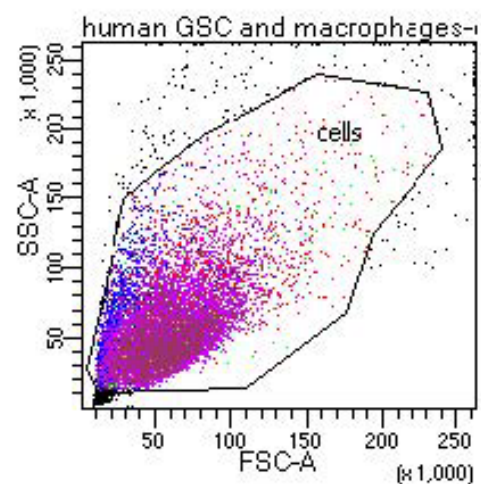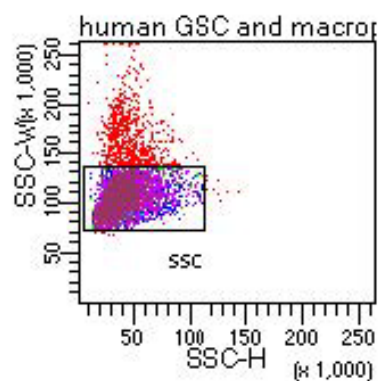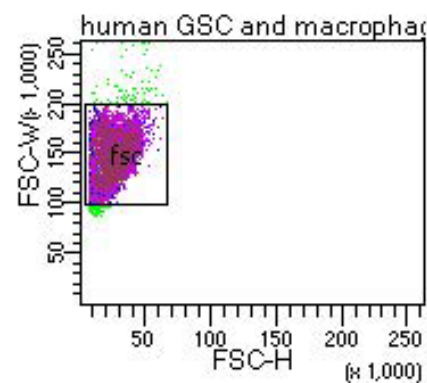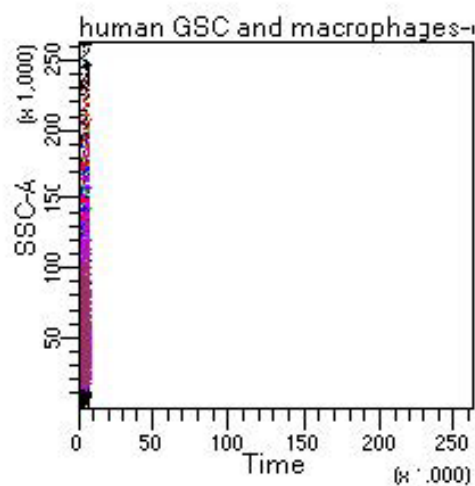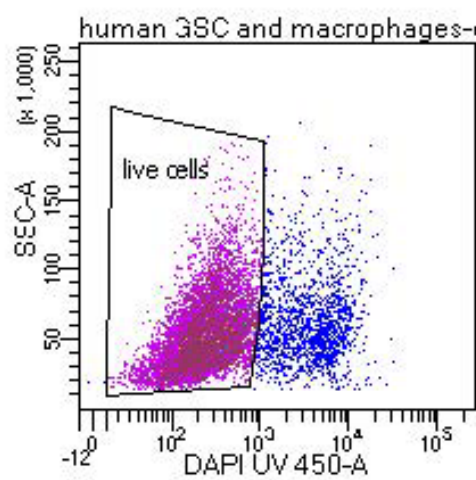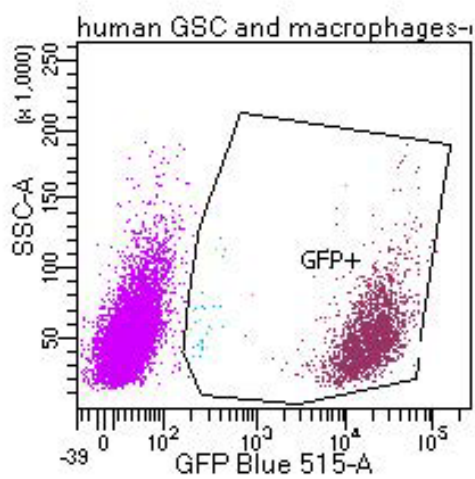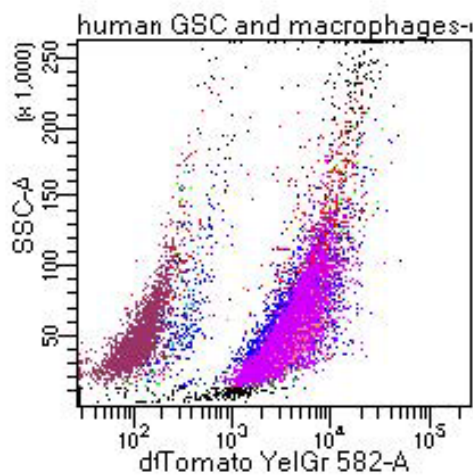

## Gating Strategy for Extended Data Fig. 1d (continued)

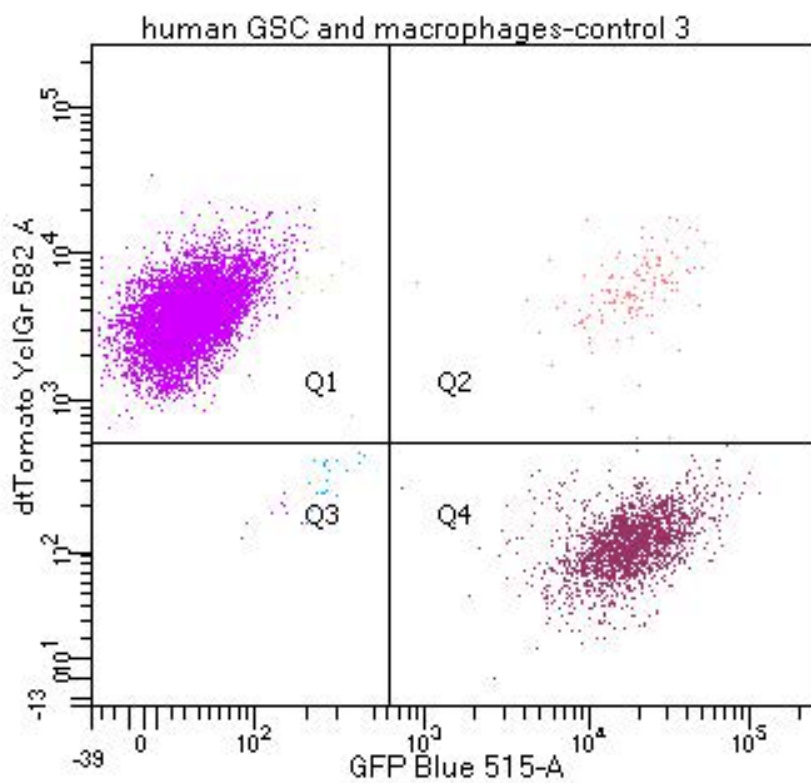

## Gating Strategy for Extended Figs. 2h and 7

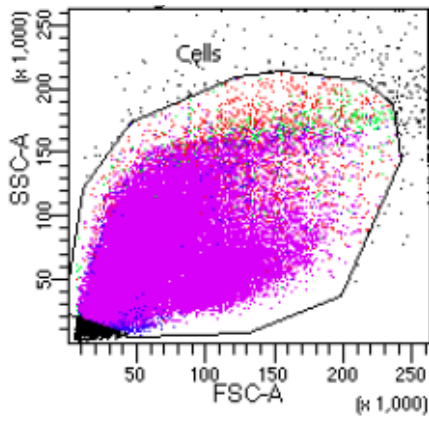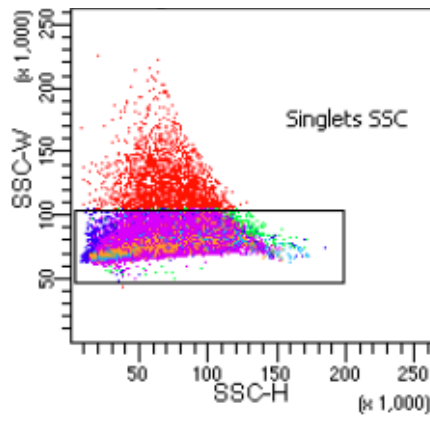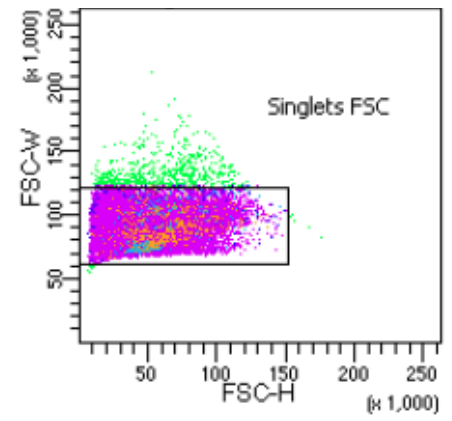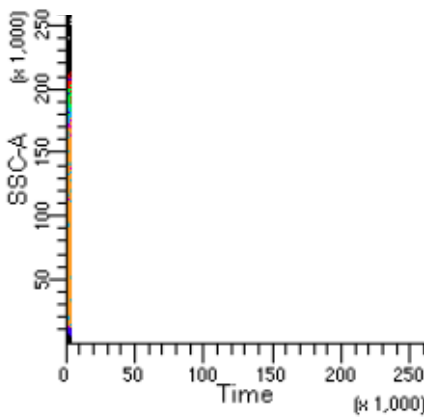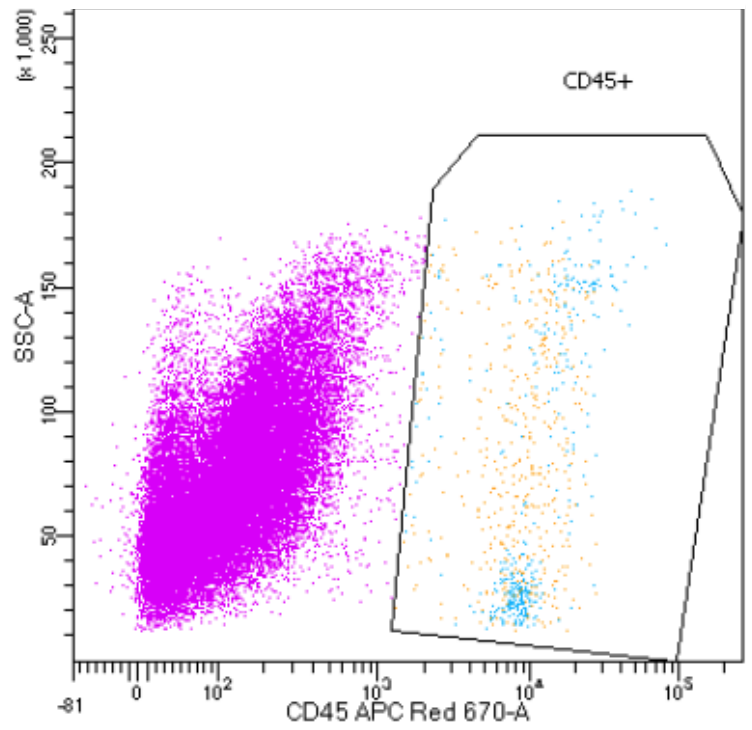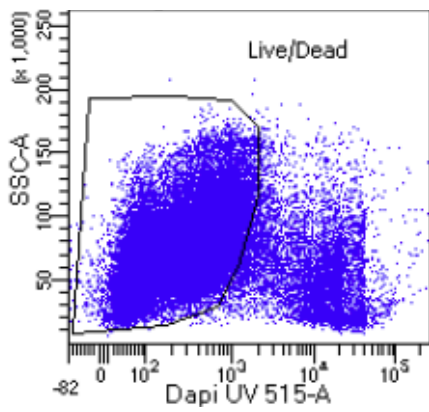

Source Data – Extended Data Fig. 2 and 7 (continued)

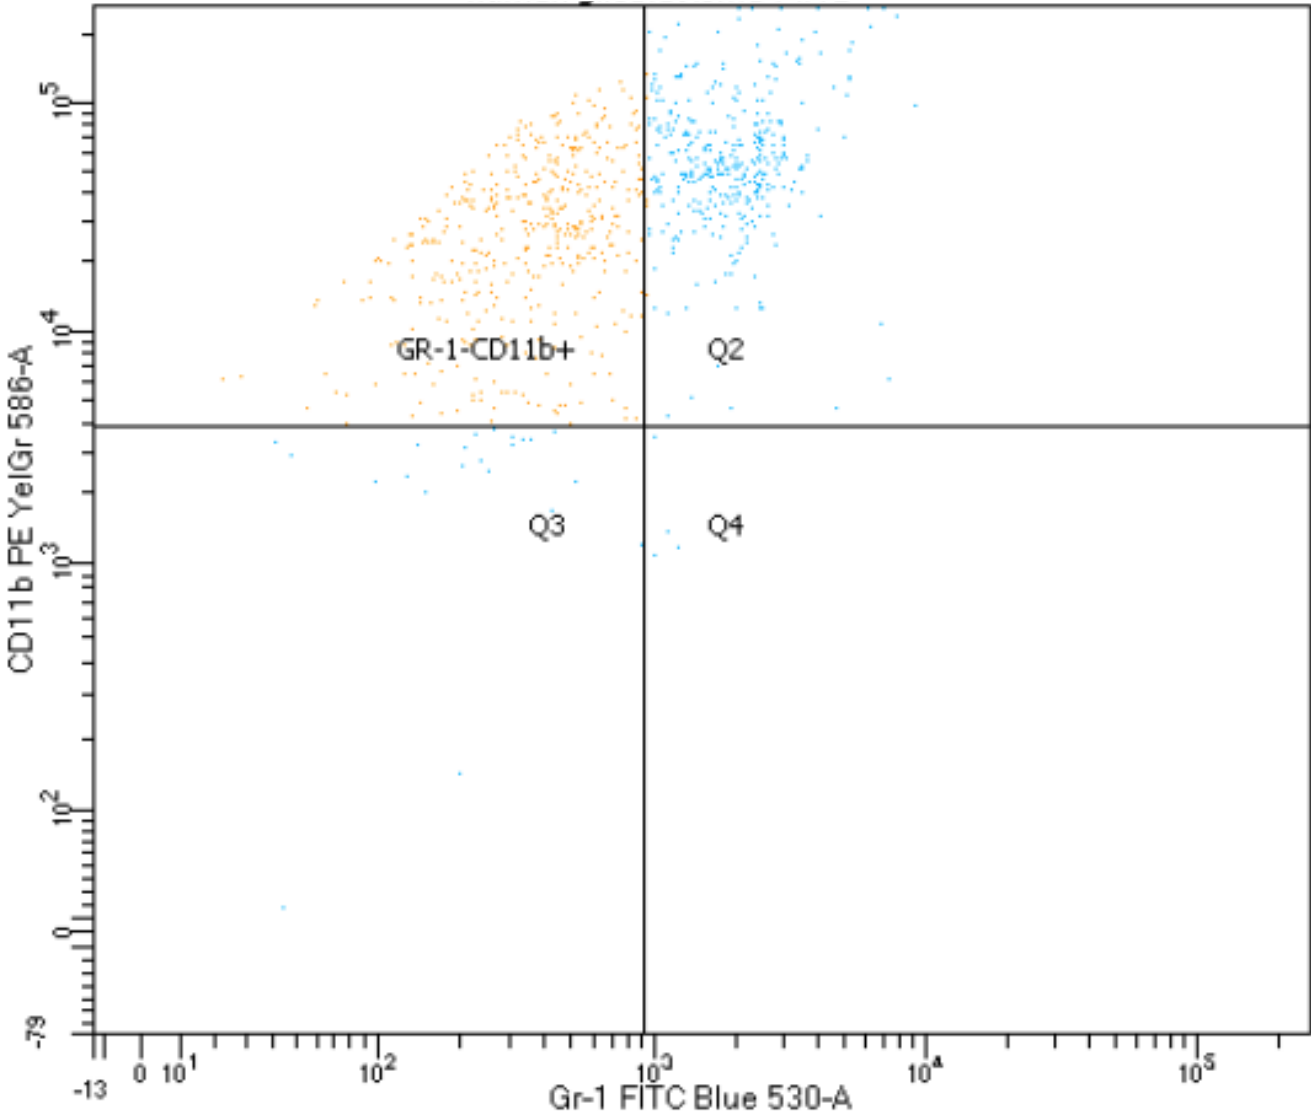

Supplement: NIHMS1740592-supplement-Supplementary_Figure_1.pdf [file NIHMS1740592-supplement-Supplementary_Figure_1.pdf]
