# Supplementary material
Source: PubMed Central journal article supplement (PMC8809483)

**Extended Data Fig. 5c**

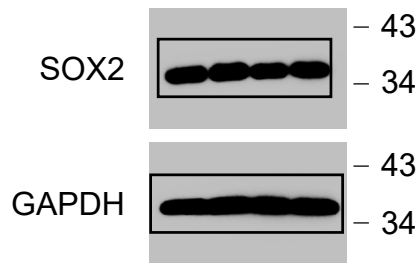

**Extended Data Fig. 5d**

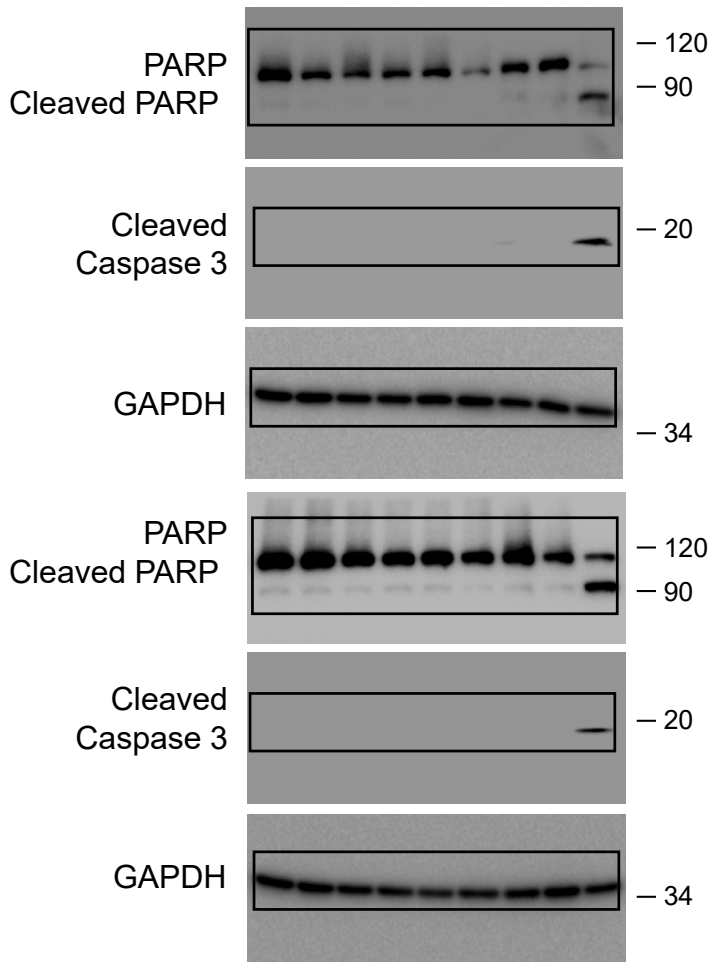

Supplement: NIHMS1740592-supplement-Blots_Source_Data_of_Extended_Data_Fig__5.pdf [file NIHMS1740592-supplement-Blots_Source_Data_of_Extended_Data_Fig__5.pdf]

**Extended Data Fig. 6c**

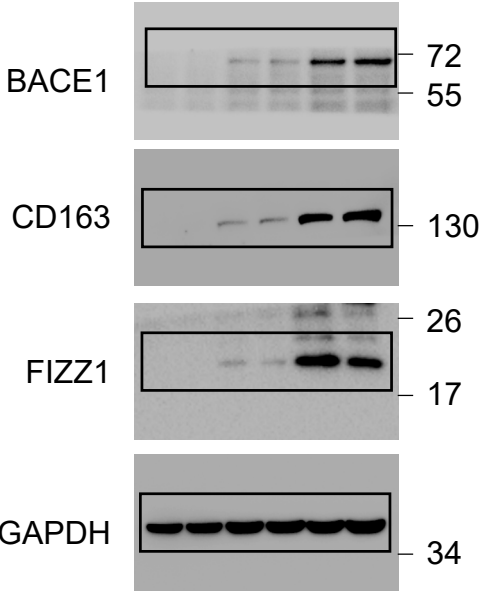

**Extended Data Fig. 6d,e**

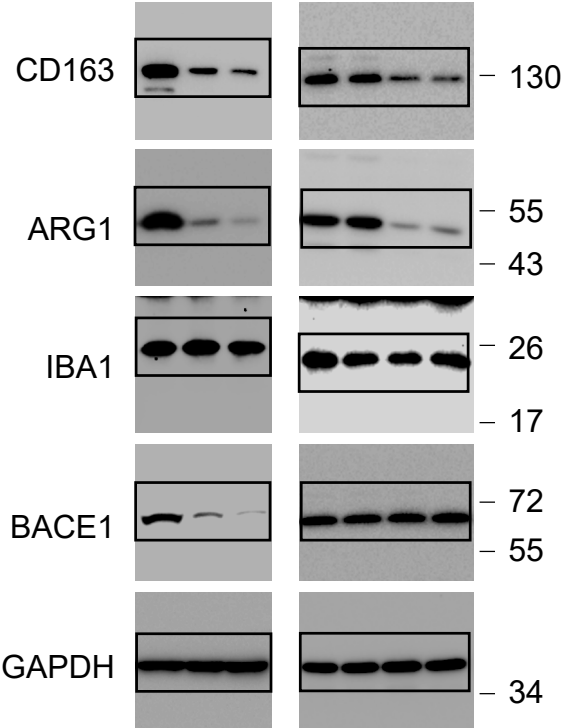

Supplement: NIHMS1740592-supplement-Blots_Source_Data_of_Extended_Data_Fig__6.pdf [file NIHMS1740592-supplement-Blots_Source_Data_of_Extended_Data_Fig__6.pdf]

**Fig. 3a**

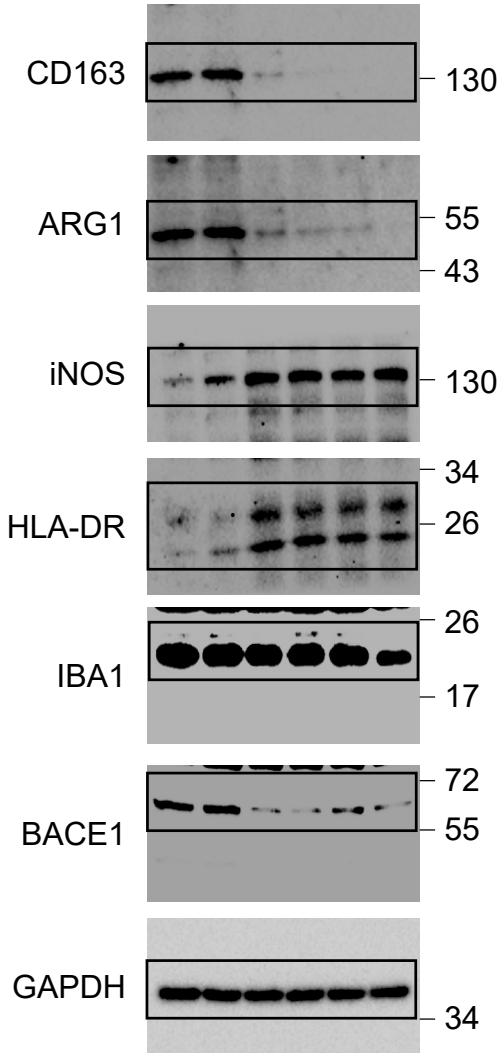

**Fig. 3b**

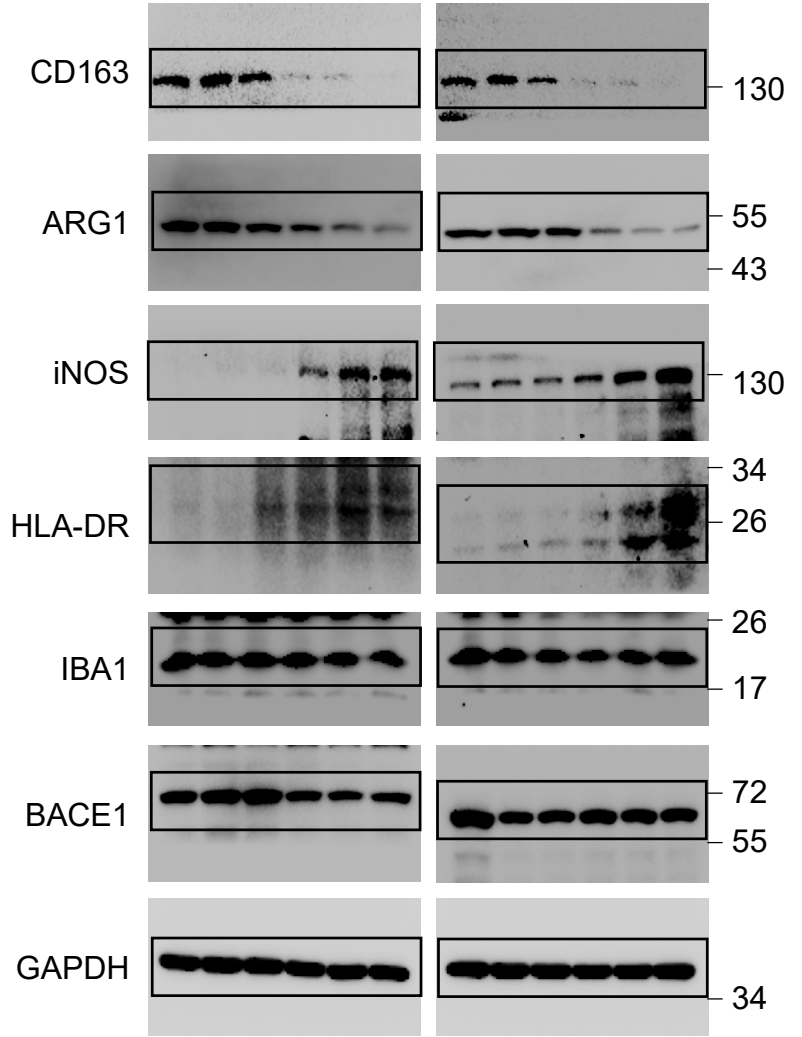

**Fig. 3 c**



Supplement: NIHMS1740592-supplement-Blots_Source_Data_of_Fig__3.pdf [file NIHMS1740592-supplement-Blots_Source_Data_of_Fig__3.pdf]
